# Supplementary material for: Pantothenate Kinase 1 Inhibits the Progression of Hepatocellular Carcinoma by Negatively Regulating Wnt/β-catenin Signaling
Source: PubMed Central journal article supplement (PMC8898371; doi:10.7150/ijbs.67842), 2022-01-24

## Supplementary materials inventory

1  
2  
3  
4  
5  
6  
7  
8  
9  
10  
11  
12  
13  
14  
15  
16  
17  
18  
19  
20  
21  
22

The supplementary materials included 3 supplementary Tables and 3 supplementary Figures.

### Supplementary Table

Table S1: Summary of Clinicopathologic Variables of 72 HCC patients.

Table S2: The primer sequences for clone and qPCR.

Table S3: Summary of Clinicopathologic Variables of 199 HCC patients in the tissue array.

### Supplementary Figure

**Figure S1** Down-regulation of PANK1 in the HCC. (A) The screening strategy for PANK1. (B) The expression of PANK1 between normal and primary HCC tumor in TCGA database. (C) Survival analysis of PANK1 in KM Plotter database. (D) The expression of PANK1 in normal tissues in The Human Protein Atlas database.

**Figure S2** The correlations between the expression of PANK1 and serum bio-marker of 199 HCC patients in the tissue array. The contents of Alpha fetal protein (AFP) (A),  $\alpha$ -L-fucosidase (AFU) (B), Alkaline phosphatase (ALP) (C), Alanine aminotransferase (ALT) (D), Aspartate aminotransferase (AST) (E), Carbohydrate antigen199 (CA199) (F), Carcino-embryonic antigen (CEA) (G), Gamma-glutamyl transpeptidase (GGT) (H), Hepatitis B virus (HBV) DNA (I), Albumin (J),

23 Prothrombin time (PT) (K), Direct Bilirubin (DBIL) (L), and Total bilirubin (TBIL)  
24 (M) were measured and the correlations were analyzed.

25 **Figure S3** The interaction between exogenously expressed PANK1 (Flag-PANK1)  
26 and RNF43 (A), AXIN1 (B), LRP6 (C),  $\beta$ -catenin (D), DVL2 (E), GSK3 $\beta$  (F) was  
27 examined in 293T cells.

**Supplementary Table S1 Summary of Clinicopathologic Variables of 72 HCC patients**

| <b>Characteristic</b>               | <b>No. of Patients</b> |
|-------------------------------------|------------------------|
| <b>Gender</b>                       |                        |
| Male                                | 60                     |
| Female                              | 12                     |
| <b>Age (years)</b>                  |                        |
| <55                                 | 26                     |
| ≥55                                 | 46                     |
| <b>Tumor size (cm)</b>              |                        |
| <5                                  | 31                     |
| ≥5                                  | 41                     |
| <b>Tumor number</b>                 |                        |
| ≤1                                  | 60                     |
| ≥2                                  | 12                     |
| <b>HBV infection</b>                |                        |
| Yes                                 | 62                     |
| No                                  | 10                     |
| <b>Organ metastasis</b>             |                        |
| Yes                                 | 7                      |
| No                                  | 65                     |
| <b>Edmondson grading</b>            |                        |
| I/II                                | 2                      |
| II/III                              | 40                     |
| III/IV                              | 30                     |
| <b>Microvascular invasion (MVI)</b> |                        |
| M0                                  | 19                     |
| M1                                  | 35                     |
| M2                                  | 18                     |

**Supplementary Table S2 The primer sequences for clone and qPCR**

| <b>Gene (homo)</b>            | <b>Forward (5'-3')</b>                                             | <b>Reverse (5'-3')</b>                                                 |
|-------------------------------|--------------------------------------------------------------------|------------------------------------------------------------------------|
| <b>PANK1 (clone)</b>          | GGATCCATGTTGAAACTCGTC                                              | GAATTCCTACTTGTTCATCAG<br>T                                             |
| <b>shPANK1 1#<br/>(clone)</b> | CCGGGCCTGCTTTATGTCGAC<br>TCTGCTCGAGCAGAGTCGACA<br>TAAAGCAGGCTTTTTG | AATTCAAAAAGCCTGCTTT<br>ATGTCGACTCTGCTCGAGC<br>AGAGTCGACATAAAGCAGG<br>C |
| <b>shPANK1 2#<br/>(clone)</b> | CCGGGCTATGCACAGGTCATT<br>CAGCTCGAGCTGAATGAACCT<br>GTGCATAGCTTTTTG  | AATTCAAAAAGCTATGCAC<br>AGGTTTCATTCAGCTCGAGCT<br>GAATGAACCTGTGCATAGC    |
| <b>PANK1 (qPCR)</b>           | CTGCCTTGATAACCCATACCC<br>T                                         | CTTGGAGTACACGGCTAGA<br>ATG                                             |
| <b>GAPDH (qPCR)</b>           | TGTTGCCATCAATGACCCCTT                                              | CTCCACGACGTA CT CAGCG                                                  |
| <b>Axin2 (qPCR)</b>           | TACACTCCTTATTGGGCGATCA                                             | TTGGCTACTCGTAAAGTTTT<br>GGT                                            |
| <b>18S (qPCR)</b>             | AGGCCCTGTAATTGGAAT<br>GAGTC                                        | GCTCCCAAGATCCAACT<br>ACGAG                                             |

**Supplementary Table S3 Summary of Clinicopathologic Variables of 199 HCC patients in the tissue array.**

| <b>Characteristic</b>            | <b>No. of Patients</b> |
|----------------------------------|------------------------|
| <b>Gender</b>                    |                        |
| male                             | 184                    |
| female                           | 15                     |
| <b>Age (years)</b>               |                        |
| ≤50                              | 114                    |
| >50                              | 85                     |
| <b>BMI (kg/m<sup>2</sup>)</b>    |                        |
| ≤18.5                            | 9                      |
| 18.5-25                          | 127                    |
| ≥25                              | 63                     |
| <b>Tumor size (cm)</b>           |                        |
| ≤11                              | 170                    |
| >11                              | 29                     |
| <b>Tumor number</b>              |                        |
| ≤1                               | 174                    |
| ≥2                               | 25                     |
| <b>Paracancerous microtumor</b>  |                        |
| No                               | 128                    |
| Yes                              | 71                     |
| <b>Intracancerous hemangioma</b> |                        |
| No                               | 116                    |
| Yes                              | 83                     |
| <b>Ascites</b>                   |                        |
| No                               | 181                    |
| Yes                              | 18                     |
| <b>Cirrhosis</b>                 |                        |
| I-II                             | 118                    |
| III-IV                           | 81                     |
| <b>PVTT</b>                      |                        |
| No                               | 174                    |
| Yes                              | 25                     |
| <b>Capsular invasion</b>         |                        |
| I-II                             | 140                    |
| III                              | 59                     |
| <b>Tumor grade</b>               |                        |
| I-II                             | 50                     |
| III                              | 149                    |
| <b>Recurrence</b>                |                        |
| No                               | 57                     |
| Yes                              | 142                    |

A

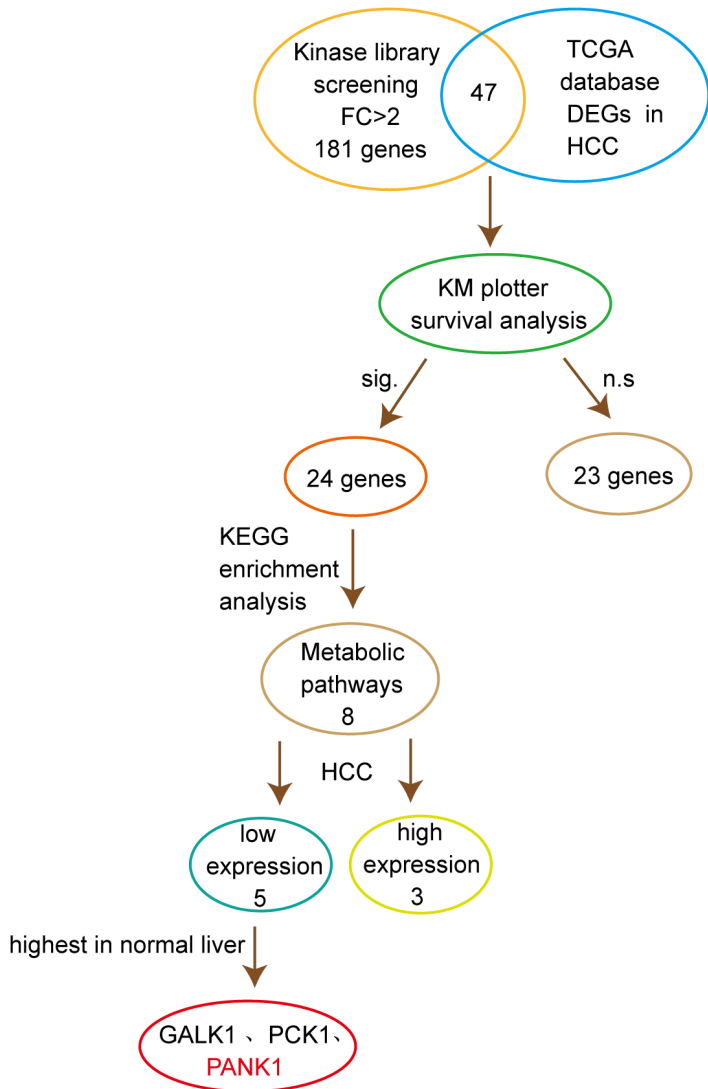

B

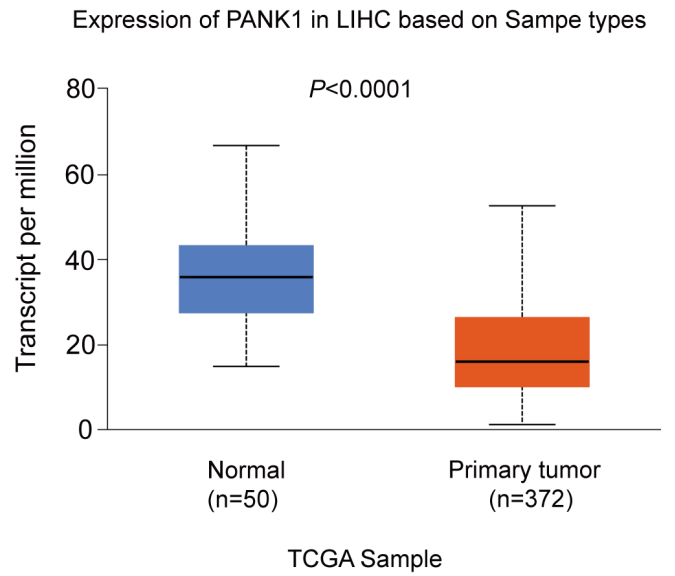

C

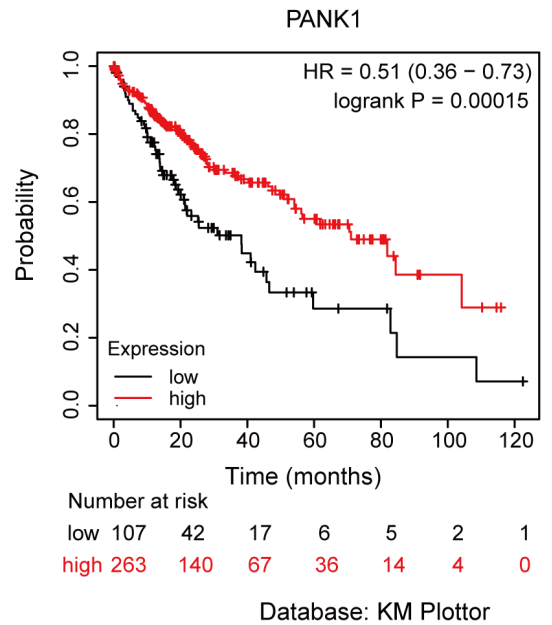

D

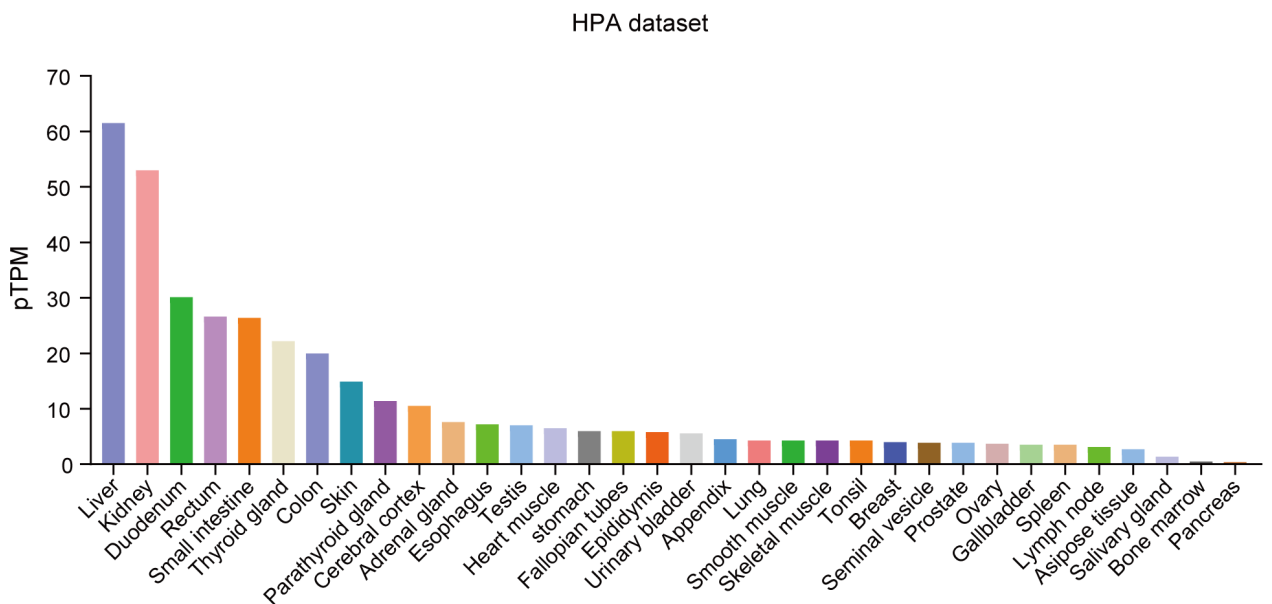

Database: THE HUMAN PROTEIN ATLAS



**A**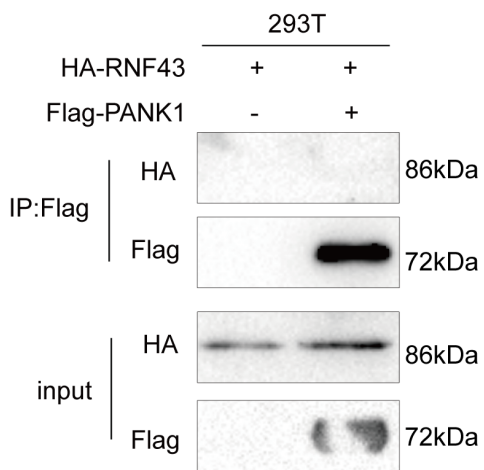**B**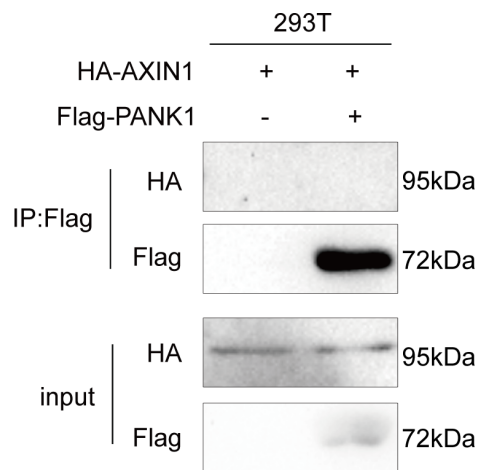**C**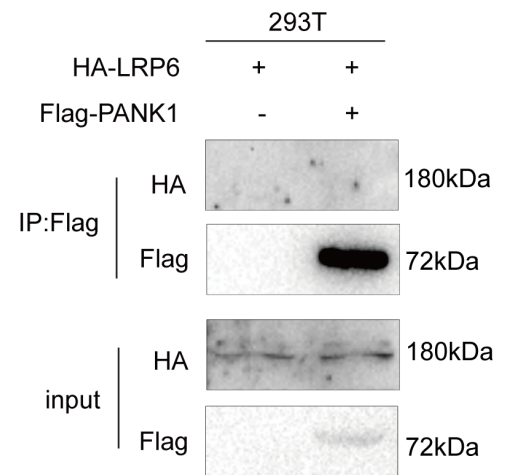**D**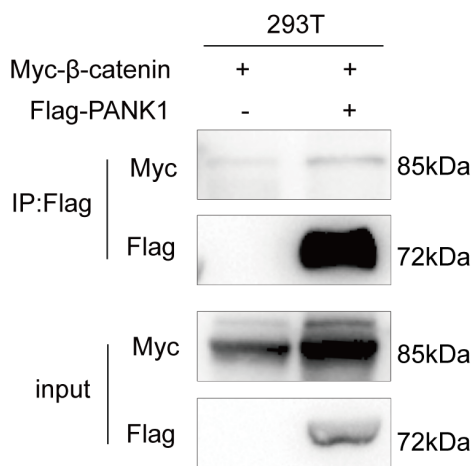**E**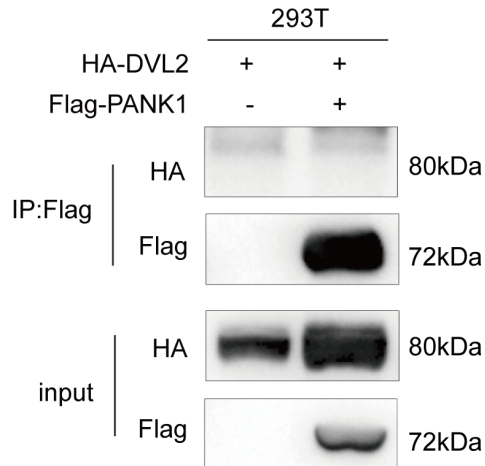**F**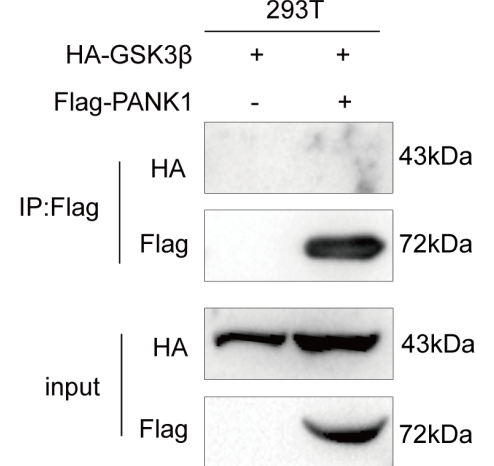

Supplement: ijbsv18p1539s1.pdf [file ijbsv18p1539s1.pdf]
